## CORRECTION

# Non-invasive long-term fluorescence live imaging of *Tribolium castaneum* embryos

Frederic Strobl and Ernst H. K. Stelzer

There were errors in the version of *Development* **141**, 2331-2338 that was published on ePress on May 6th, 2014.

In the Results and Discussion, Figs 2 and 3 were incorrectly cited as follows: in the section Characteristics of the EFA-nGFP *Tribolium* line in LSM, citations to Fig. 3C, 3D, 3E and 3F should have been to Fig. 2C, 2D, 2E and 2F; in the section Serosa scar formation and serosa opening, citations to Fig. 2A and 2B (first paragraph) should have been to Fig. 3A and 3B, and the citation to Fig. 2C (last paragraph) should have been to Fig. 3C.

In the Materials and Methods, lines 13/14 of the Image processing section should have stated: Images that underwent this procedure are marked as maximum projections with image processing (MP).

These errors have been corrected in the full online and print issues.

The authors apologise to readers for these mistakes.
